# Supplementary material
Source: MDPI journal article supplement (https://www.mdpi.com/2073-4360/6/12/3019)

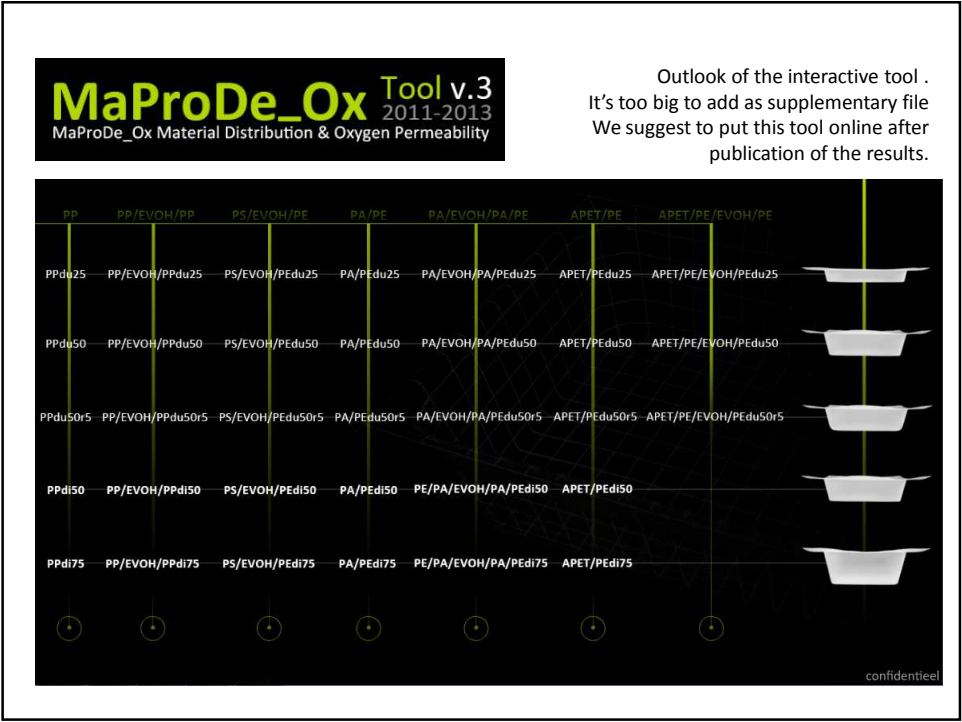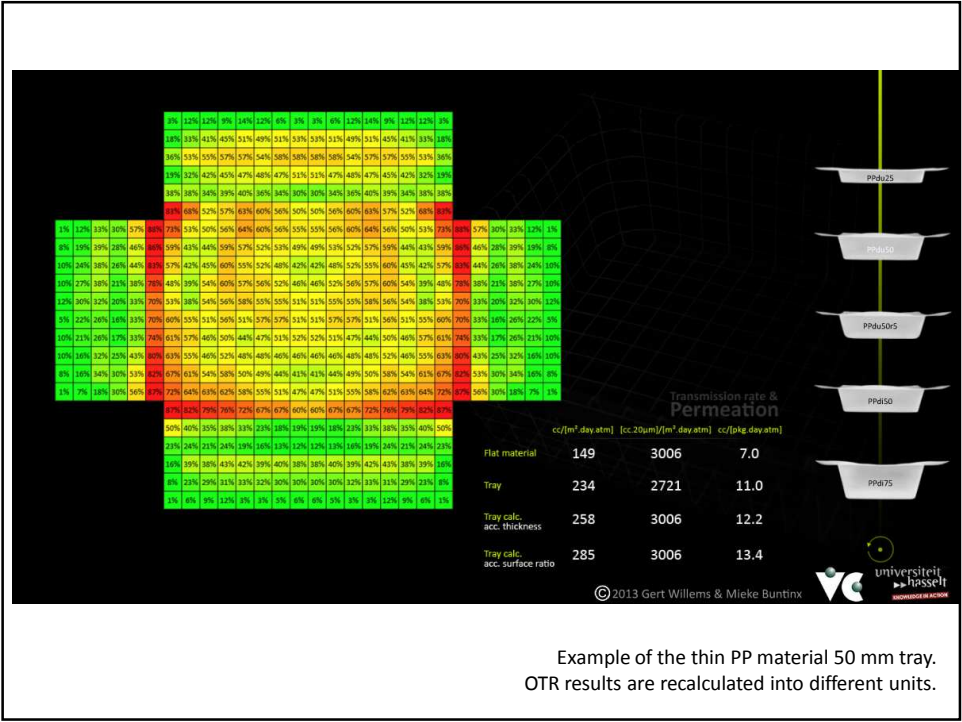

Supplement: s1 [file s1]
